# Supplementary material for: Engineered global regulator H-NS improves the acid tolerance of E. coli
Source: PubMed Central journal article supplement (PMC6064147; doi:10.1186/s12934-018-0966-z), 2018-07-27

EP

SP

MG

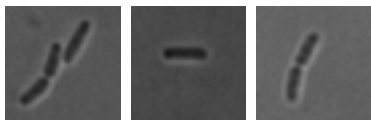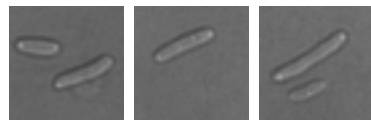

H-NS(WT)

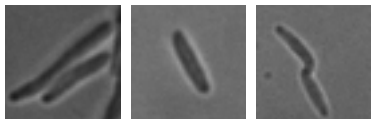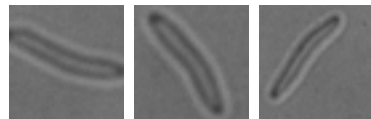

3-36

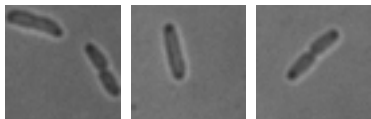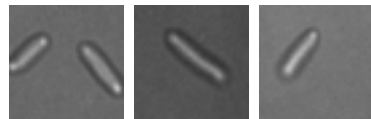

5-30

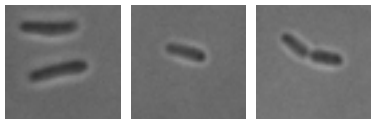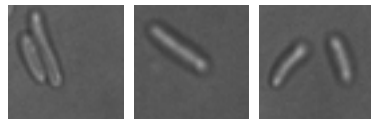

9-1

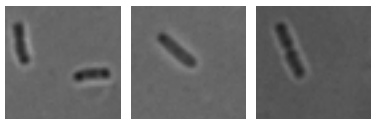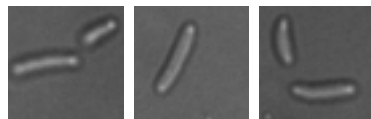

9-36

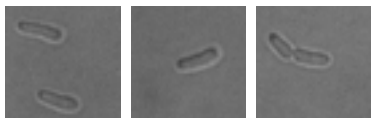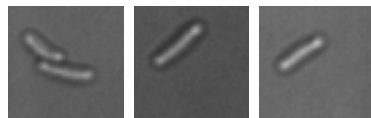

10-21

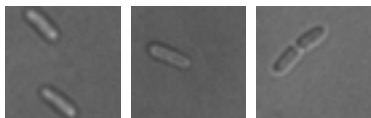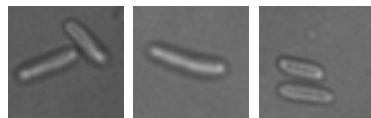

Supplement: 12934_2018_966_MOESM2_ESM.pdf [file 12934_2018_966_MOESM2_ESM.pdf]
