# Supplementary material for: Engineered global regulator H-NS improves the acid tolerance of E. coli
Source: PubMed Central journal article supplement (PMC6064147; doi:10.1186/s12934-018-0966-z), 2018-07-27
Supplement: 12934_2018_966_MOESM4_ESM.pdf [file 12934_2018_966_MOESM4_ESM.pdf]

**Fold Change**

20.0  
16.0  
12.0  
8.0  
4.0  
0.0

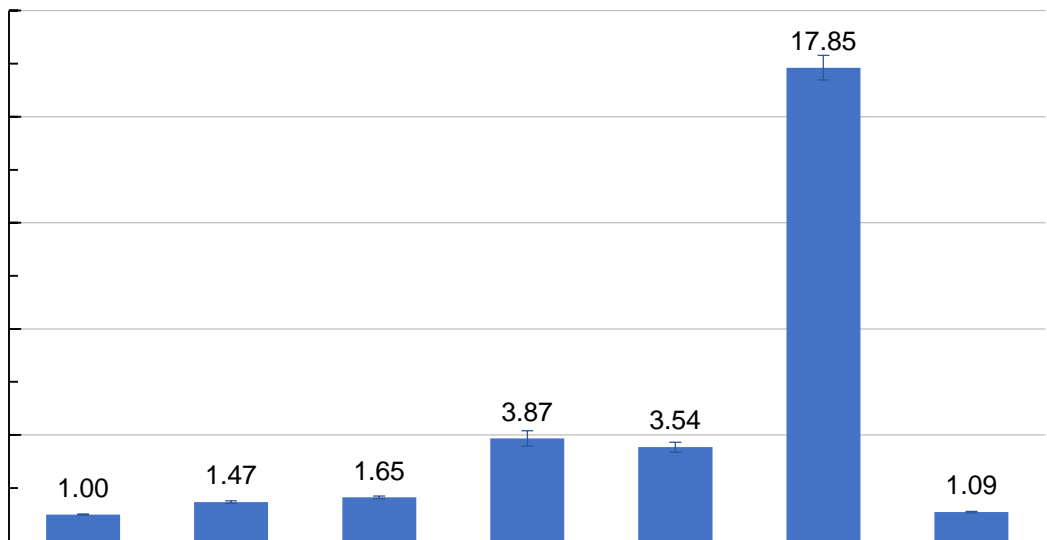

MG

H-NS(WT)

3-36

5-30

9-7

9-36

10-21
