# Supplementary material for: Engineered global regulator H-NS improves the acid tolerance of E. coli
Source: PubMed Central journal article supplement (PMC6064147; doi:10.1186/s12934-018-0966-z), 2018-07-27

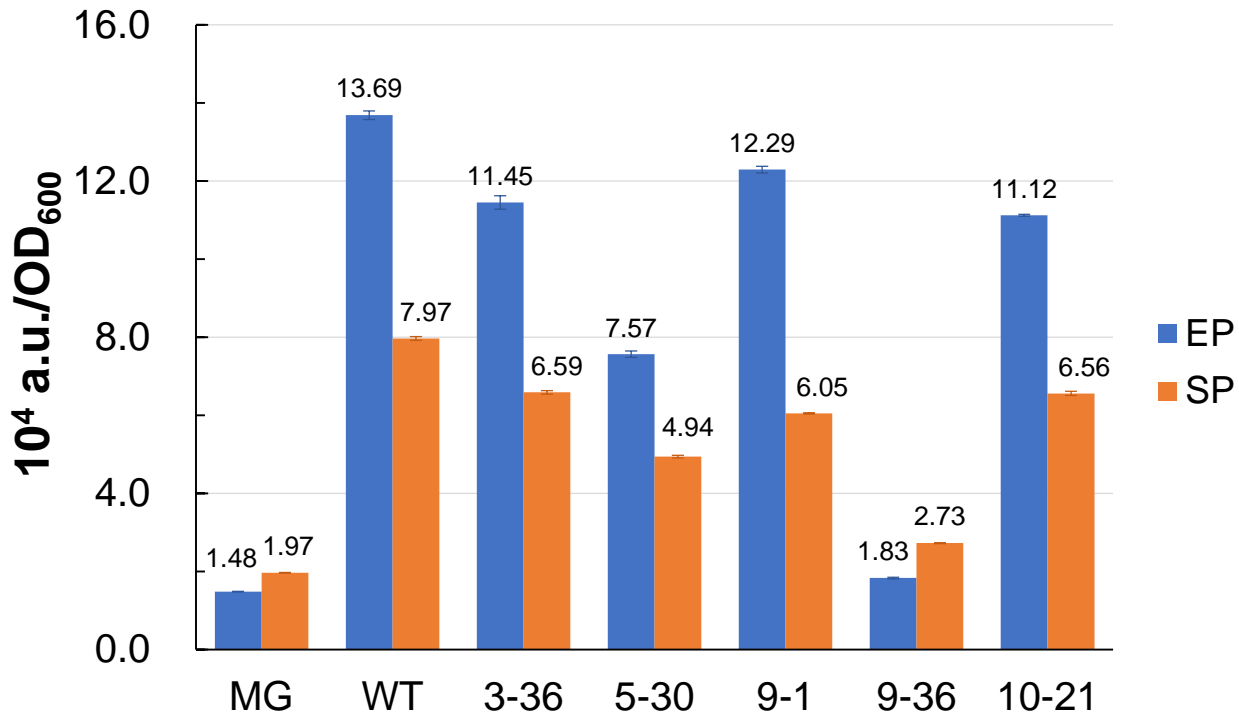

Supplement: 12934_2018_966_MOESM5_ESM.pdf [file 12934_2018_966_MOESM5_ESM.pdf]
